# Supplementary material
Source: PubMed Central journal article supplement (PMC6894984)
Supplement: NIHMS1543713-supplement-2.pdf [file NIHMS1543713-supplement-2.pdf]

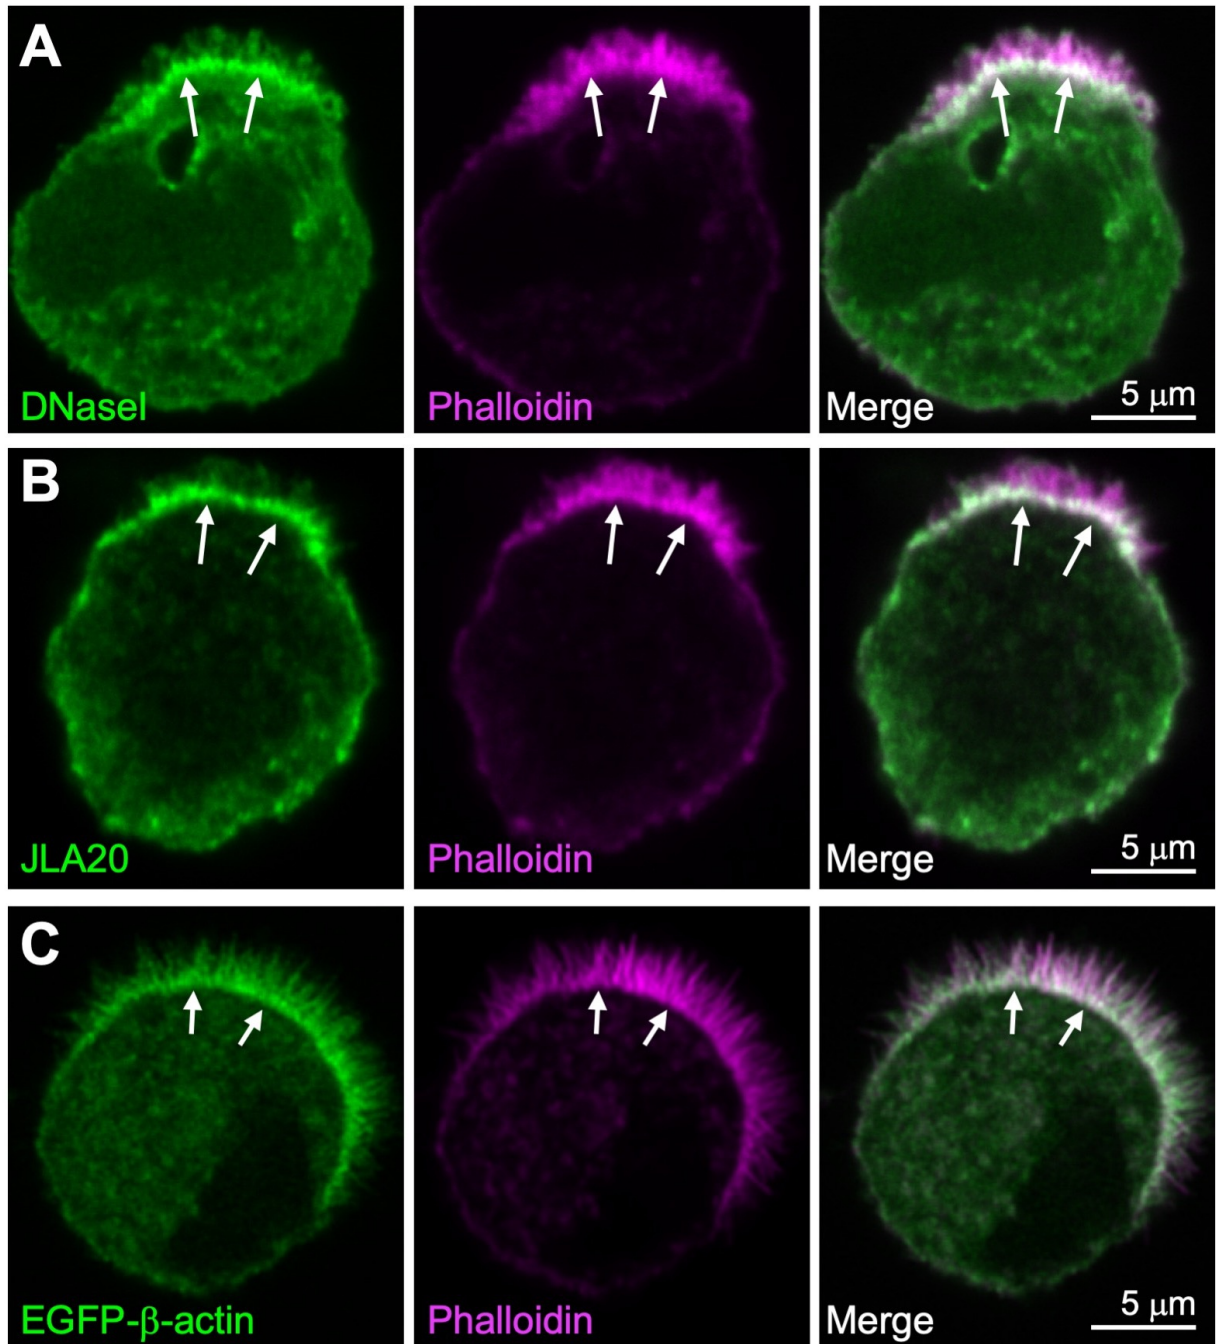

**Figure S1. Localization of G-actin in the terminal web of W4 cells. Related to Figure 6.** (A) DNaseI, (B) JLA20 antibody, and (C) EGFP- $\beta$ -actin localization (green in all cases) in polarized W4 cells counter-stained for F-actin using phalloidin (magenta). Terminal web enrichment is highlighted by white arrows in individual panels. Scale bars are shown in merge panels.
